# Supplementary material
Source: Springer Nature journal article supplement (https://www.springermedizin.de/resource/supplementary/12887_2009_276_MOESM2_ESM.pdf/9477674)
Supplement: MOESM2 [file 9477674]

| bwt (kg) | Dose                      |                           | cost/month (MK) |
|----------|---------------------------|---------------------------|-----------------|
|          | AM                        | PM                        |                 |
| 8-<10    | 1/4 LamS 40 + 1/2 NVP 200 | 1/4 LamS 40 + 1/4 NVP 200 | 1076            |
| 10-<15   | 1/2 LamS 30 + 1/2 NVP 200 | 1/2 LamS 30 + 1/2 NVP 200 | 1701            |
| 15-<20   | 1/2 LamS 40 + 1 NVP 200   | 1/2 LamS 40 + 1/4 NVP 200 | 1926            |
| 20-<25   | 1 LamS 30 + 1 NVP 200     | 1/2 LamS 30 + 1/2 NVP 200 | 2552            |
| ≥25      | 1 Triomune30              | 1 Triomune30              | 2500            |
